# Supplementary material for: Is Mitral Valve Repair Superior to Mitral Valve Replacement in Elderly Patients? Comparison of Short‐ and Long‐Term Outcomes in a Propensity‐Matched Cohort
Source: PubMed Central journal article supplement (PMC5015286; doi:10.1161/jaha.116.003605), 2016-07-28

## SUPPLEMENTAL MATERIAL

**Figure S1:** Grade of MR 1 year after MV-repair and MVR ( $p < 0.01$ ). Data was available for 127 patients (47.4% of survivors).

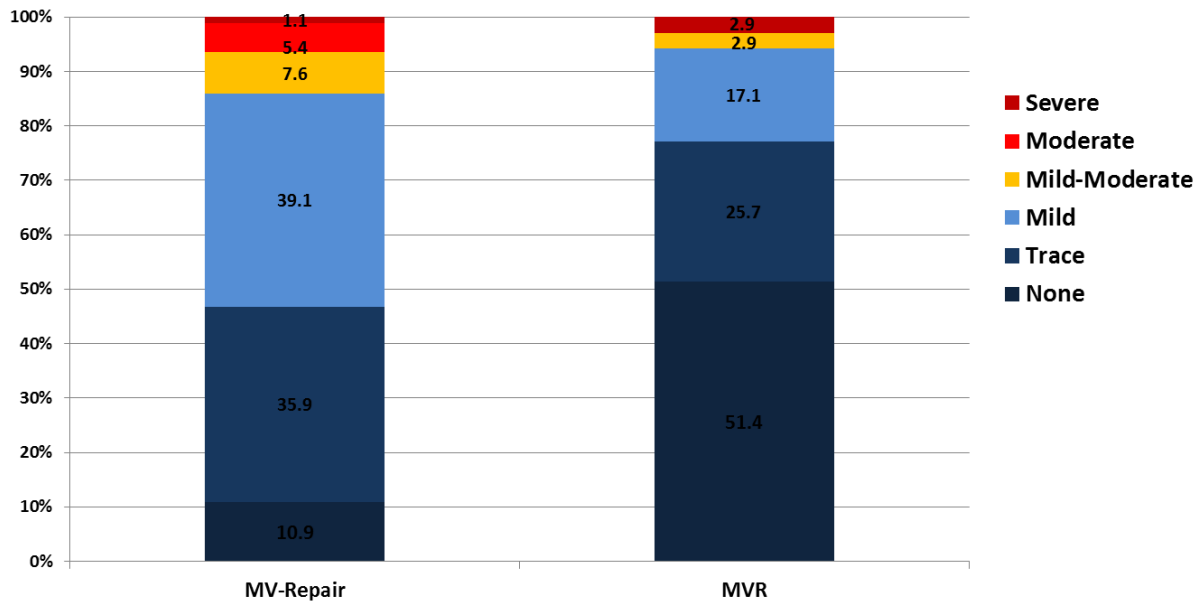

**Figure S2:** Direct correlation of LV-function in individuals with available follow-up.

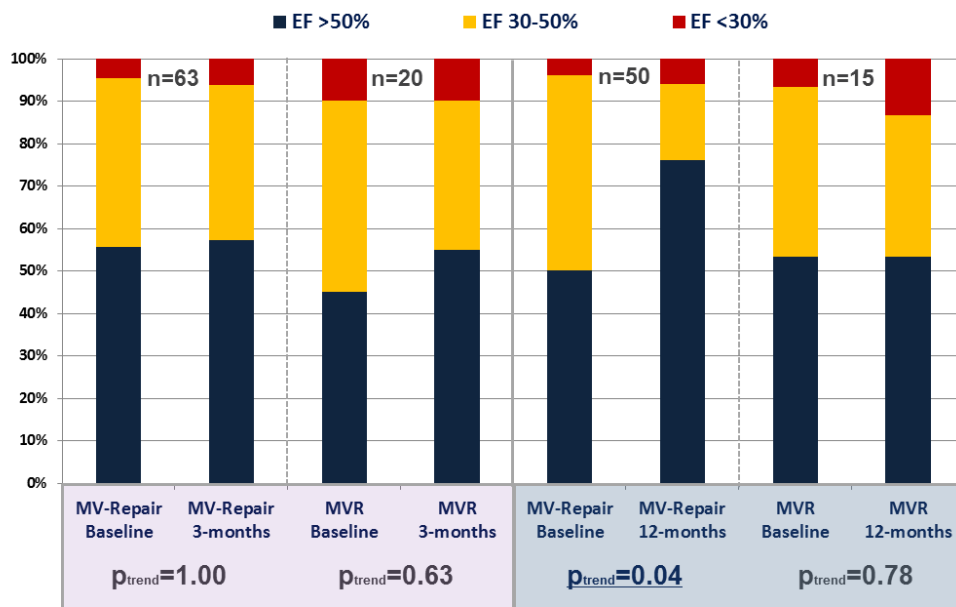

Supplement: JAH3-5-e003605-s001.pdf [file JAH3-5-e003605-s001.pdf]
